# Supplementary material
Source: PubMed Central journal article supplement (PMC3557664)

## Anterior

## Posterior

Normally Aerated

Poorly Aerated

Normally Aerated

Poorly Aerated

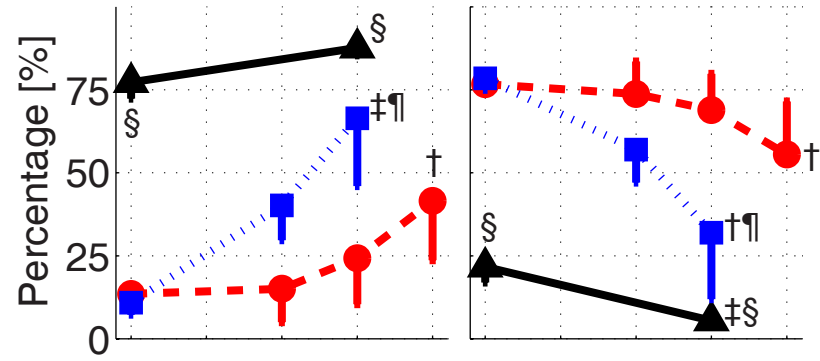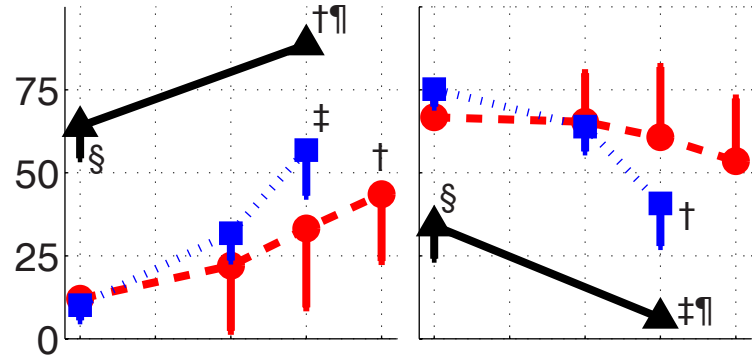

Hyper-Inflated

Non-Aerated

Hyper-Inflated

Non-Aerated

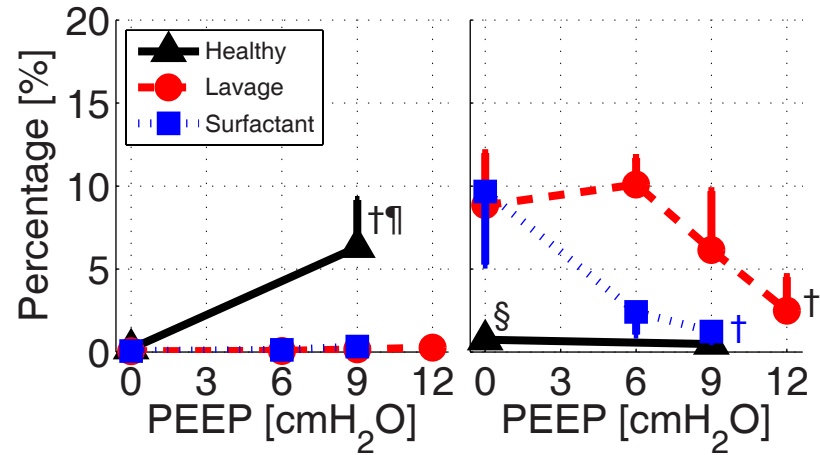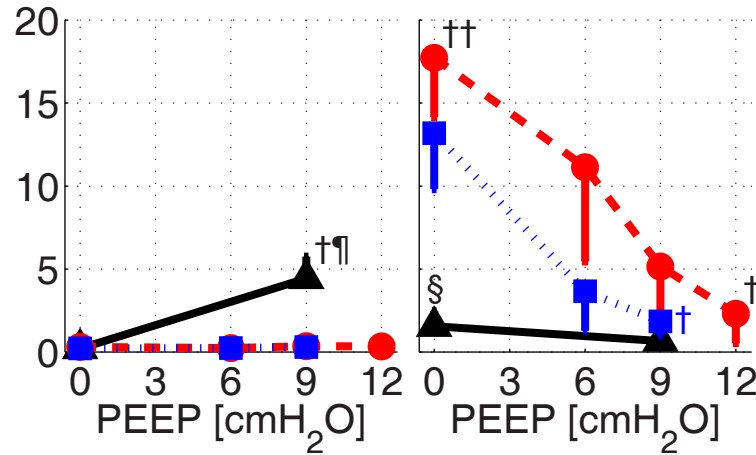

Supplement: NIHMS402185-supplement-2.pdf [file NIHMS402185-supplement-2.pdf]
