# Supplementary material
Source: PubMed Central journal article supplement (PMC3557664)

MRI ADC

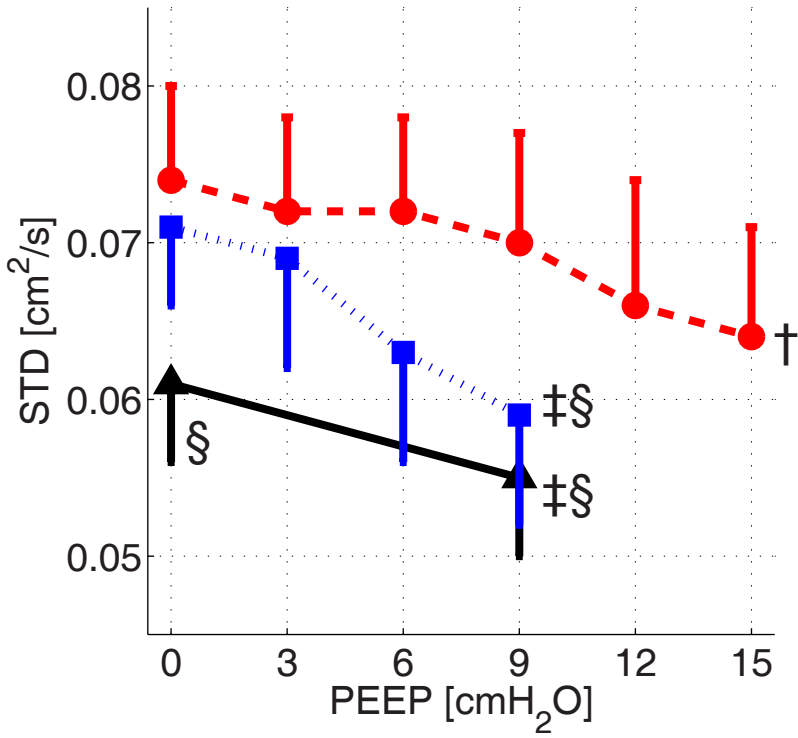

CT Density

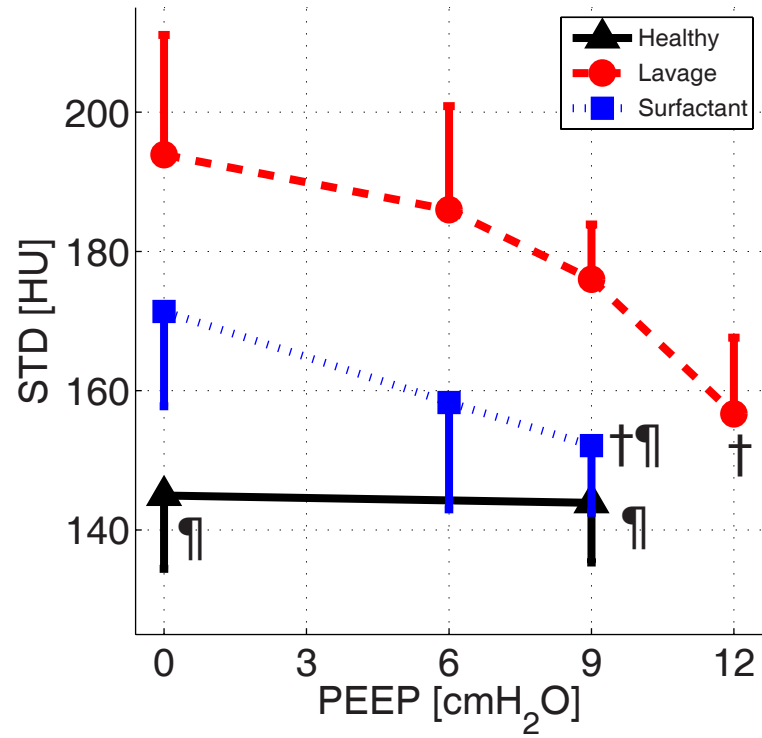

Supplement: NIHMS402185-supplement-1.pdf [file NIHMS402185-supplement-1.pdf]

Anterior

Posterior

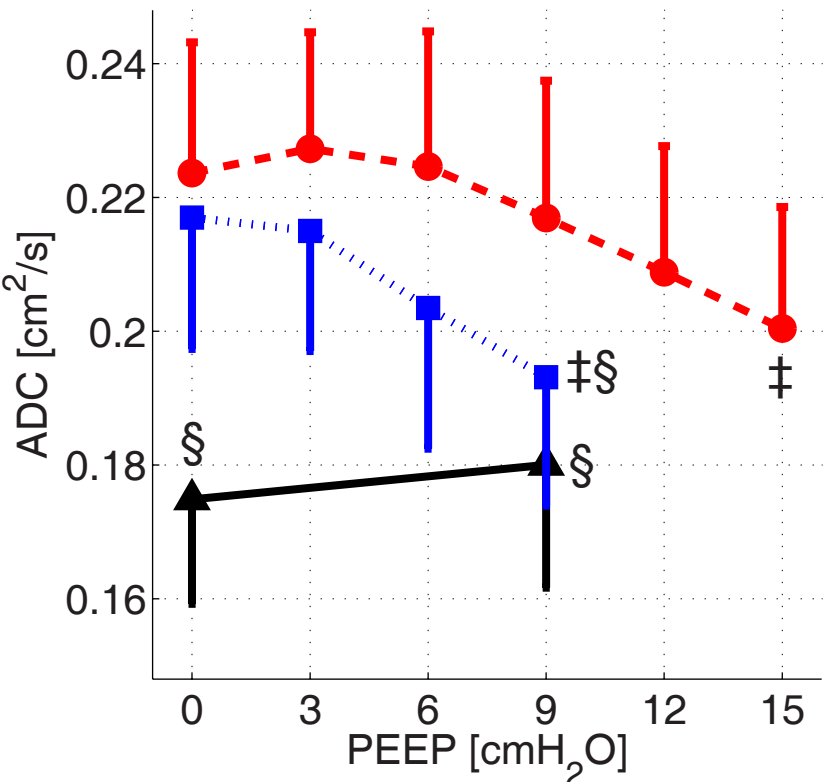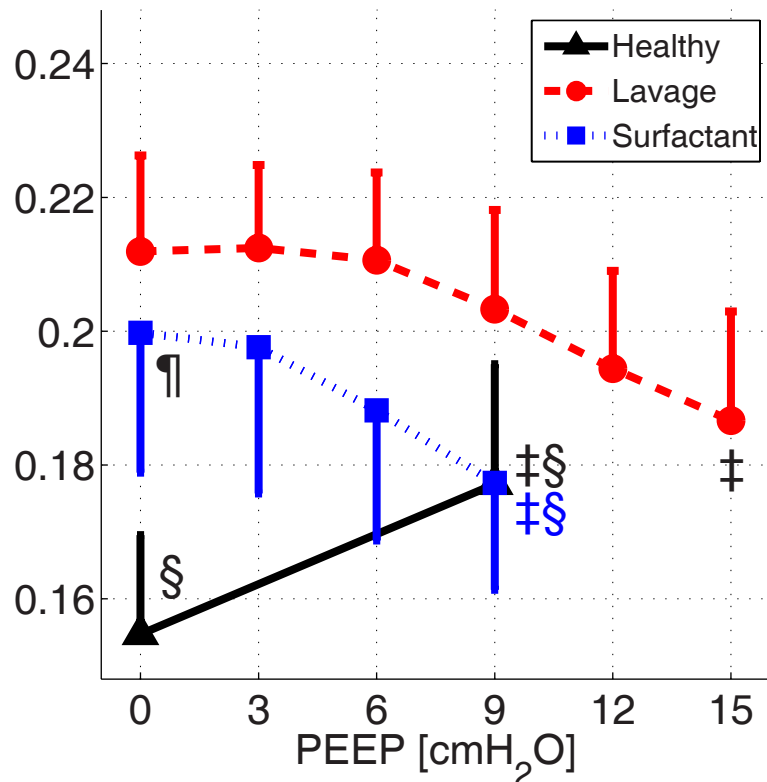

Supplement: NIHMS402185-supplement-3.pdf [file NIHMS402185-supplement-3.pdf]

PEEP  
[cmH<sub>2</sub>O]

0

6

9

12

Healthy

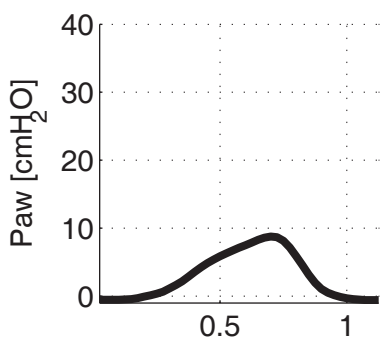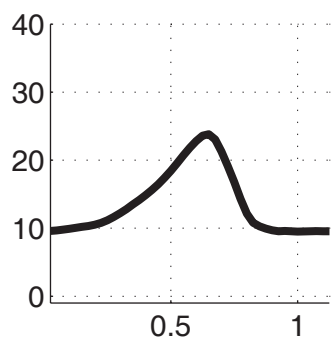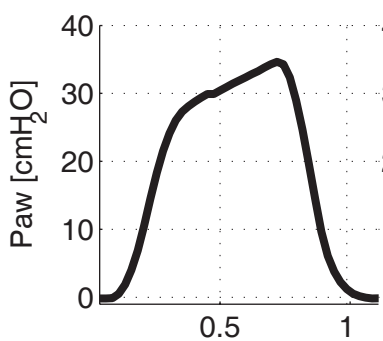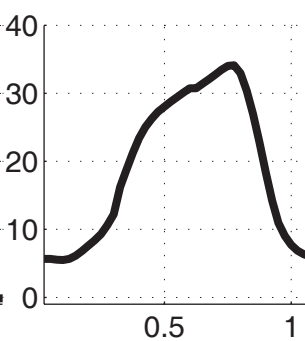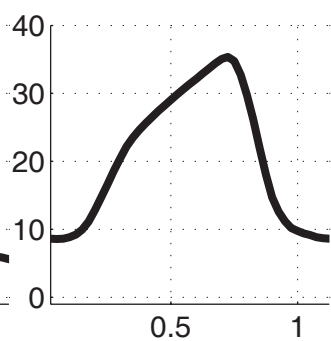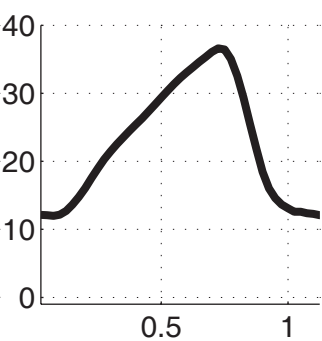

Saline  
Lavage

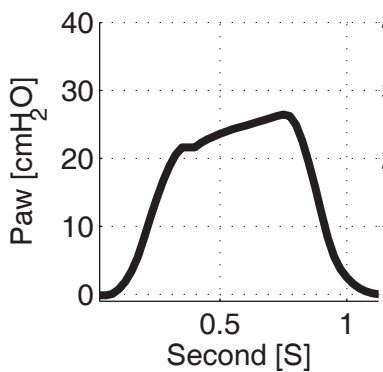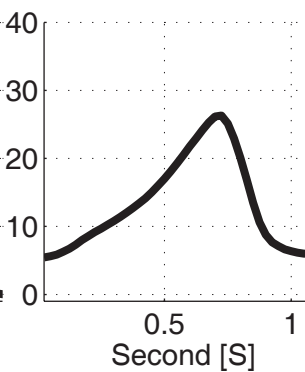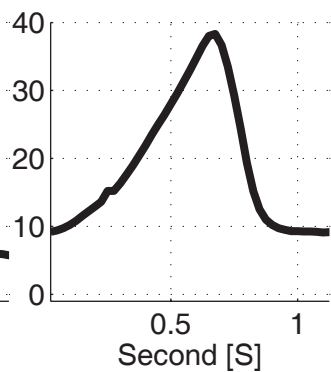

Surfactant

Supplement: NIHMS402185-supplement-4.pdf [file NIHMS402185-supplement-4.pdf]
